# Supplementary material
Source: PubMed Central journal article supplement (PMC2092458)
Supplement: thorax_thx.2006.061044_1.pdf [file thorax_thx.2006.061044_1.pdf]

**Table E1. Pearson correlation coefficients (r) showing association between changes (visit 3 - visit 1) in physiological variables and symptom and HRQOL scores**

|                   | <b>FEV<sub>1</sub></b> | <b>VC</b>    | <b>IC</b>    | <b>PEF</b> | <b>P<sub>a</sub>O<sub>2</sub></b> | <b>X<sub>rs,insp</sub></b> | <b>X<sub>rs,exp</sub></b> | <b>%FL</b> |
|-------------------|------------------------|--------------|--------------|------------|-----------------------------------|----------------------------|---------------------------|------------|
| <b>OCD</b>        | <b>0.500</b>           | NS           | NS           | NS         | <b>0.594</b>                      | <b>0.430</b>               | NS                        | NS         |
| <b>Borg</b>       | NS                     | NS           | NS           | NS         | NS                                | NS                         | NS                        | NS         |
| <b>TDI</b>        | <b>0.372</b>           | <b>0.321</b> | NS           | NS         | <b>0.552</b>                      | <b>0.458</b>               | <b>0.396</b>              | NS         |
| <b>LCADL</b>      | <b>-0.499</b>          | NS           | NS           | NS         | <b>-0.495</b>                     | <b>-0.408</b>              | NS                        | NS         |
| <b>Mobility</b>   | NS                     | <b>0.428</b> | <b>0.329</b> | NS         | <b>0.438</b>                      | <b>0.493</b>               | <b>0.449</b>              | NS         |
| <b>SGRQ</b>       |                        |              |              |            |                                   |                            |                           |            |
| <b>Activities</b> | NS                     | NS           | NS           | NS         | NS                                | NS                         | <b>-0.333</b>             | NS         |
| <b>Impacts</b>    | NS                     | NS           | NS           | NS         | NS                                | <b>-0.420</b>              | <b>-0.374</b>             | NS         |
| <b>Total</b>      | NS                     | NS           | NS           | NS         | NS                                | <b>-0.442</b>              | <b>-0.428</b>             | NS         |
